# Supplementary material for: Key drivers of visual acuity gains in neovascular age-related macular degeneration in real life: findings from the AURA study
Source: PubMed Central journal article supplement — Br J Ophthalmol. 2016 Mar 30;100(12):1623–8. doi: 10.1136/bjophthalmol-2015-308166 (PMC5256408; doi:10.1136/bjophthalmol-2015-308166), 2016-03-30
Supplement: bjophthalmol-2015-308166supp.pdf [file bjophthalmol-2015-308166supp.pdf]

## SUPPLEMENT

**Supplement Figure 1** Association between candidate variables at baseline and postbaseline and effectiveness of ranibizumab in patients with neovascular AMD.

PED, pigment epithelial detachment; VAS, visual acuity score; AMD, age-related macular degeneration.

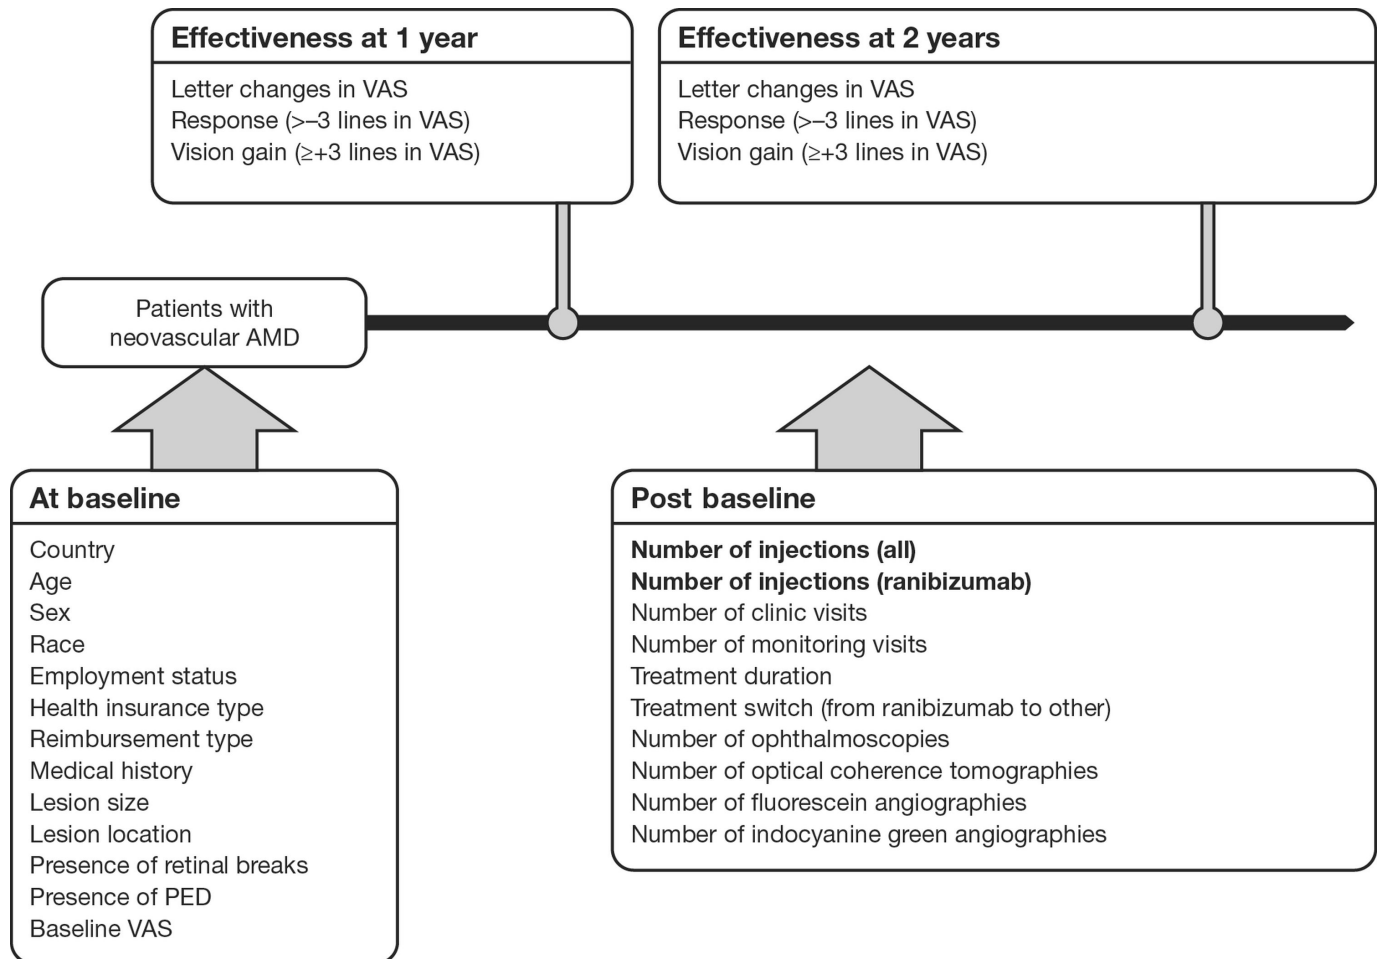

**Supplement Figure 2** Resource utilisation for (A) year 1 and (B) year 2 completers according to number of ranibizumab injections received during year 1 (<5, 5–7, >7 injections) and over the 2-year period (<10, 10–14, >14 injections).

FA, fluorescein angiography; ICGA, indocyanine green angiography; OCT, optical coherence tomography. \* $p < 0.05$ ; † $p < 0.001$  between groups ( $p$ -value was derived from analysis of variance for continuous variables and chi-squared test for categorical variables).

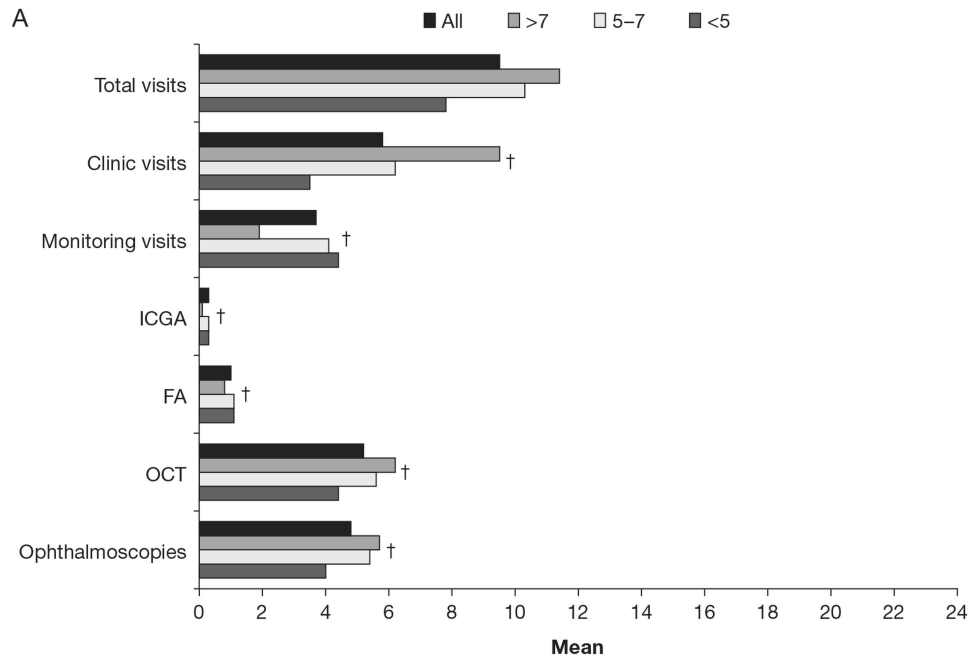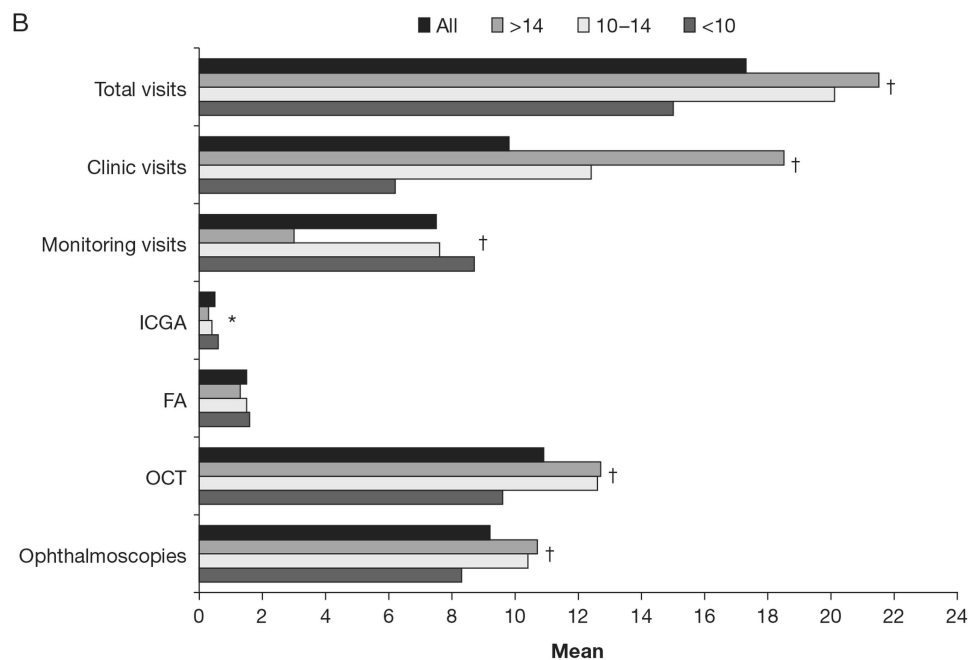

**Supplement Table 1** AURA-derived data descriptions.

| Variable                         | Type     | Label                                                                                     | Values                                                                                                                                  |
|----------------------------------|----------|-------------------------------------------------------------------------------------------|-----------------------------------------------------------------------------------------------------------------------------------------|
| SUBJIDN                          | Num      | Patient identifier for the study, N                                                       |                                                                                                                                         |
| SAF                              | Num      | Safety analysis set                                                                       | Data set definition                                                                                                                     |
| EFF                              | Num      | Efficacy analysis set                                                                     | Data set definition                                                                                                                     |
| EFF1Y                            | Num      | First year completer<br>(efficacy analysis set)                                           | Data set definition                                                                                                                     |
| EFF2Y                            | Num      | Second year completer<br>(efficacy analysis set)                                          | Data set definition                                                                                                                     |
| BET                              | Num      | Both eyes treated<br>(efficacy analysis set)                                              | Data set definition                                                                                                                     |
| COUNTRY                          | Char/cat | Country                                                                                   | France / Germany / Canada /<br>UK / Ireland / Italy /<br>Netherlands / Venezuela                                                        |
| SEXN                             | Num/cat  | Sex, N                                                                                    | 1: Male / 2: Female                                                                                                                     |
| AGE_START                        | Num/cont | Age at start of therapy                                                                   |                                                                                                                                         |
| AGE_START_cat                    | Num/cat  | Age at start of therapy<br>(categories)                                                   | .: Missing / 1: <65 years / 2:<br>≥65 to <75 years / 3: ≥75 years                                                                       |
| RACEALLN                         | Num/cat  | Race, N                                                                                   | 1: White / 2: Black / 3: Asian /<br>4: Other / 996: Not reported                                                                        |
| EMPLOY                           | Num/cat  | Employment status                                                                         | 1: Employed / 2: Self-employed<br>/ 3: Seeking work / 4: Retired /<br>5: Student / 6: Keeping house /<br>996: Not reported / 998: Other |
| insurance_public                 | Num/cat  | Public insurance                                                                          | .: Missing / 0: No / 1: Yes                                                                                                             |
| insurance_private                | Num/cat  | Private insurance                                                                         | .: Missing / 0: No / 1: Yes                                                                                                             |
| insurance_no                     | Num/cat  | No insurance                                                                              | .: Missing / 0: No / 1: Yes                                                                                                             |
| insurance_other                  | Num/cat  | Other insurance                                                                           | .: Missing / 0: No / 1: Yes                                                                                                             |
| reimbursement_individual         | Num/cat  | Reimbursement granted<br>individually for this patient and<br>treatment occasion          | .: Missing / 0: No / 1: Yes                                                                                                             |
| reimbursement_national_standards | Num/cat  | Reimbursement according to<br>national standards                                          | .: Missing / 0: No / 1: Yes                                                                                                             |
| reimbursement_separate_contract  | Num/cat  | Separate contract                                                                         | .: Missing / 0: No / 1: Yes                                                                                                             |
| reimbursement_independently      | Num/cat  | Reimbursement granted for<br>patient independently of how<br>often treatment was provided | .: Missing / 0: No / 1: Yes                                                                                                             |
| reimbursement_patient            | Num/cat  | Patient covers costs                                                                      | .: Missing / 0: No / 1: Yes                                                                                                             |
| reimbursement_unknown            | Num/cat  | Reimbursement unknown                                                                     | .: Missing / 0: No / 1: Yes                                                                                                             |
| reimbursement_other              | Num/cat  | Other reimbursement                                                                       | .: Missing / 0: No / 1: Yes                                                                                                             |
| STUDYEYE                         | Char/cat | Study eye                                                                                 | Right / Left                                                                                                                            |
| MHLAT                            | Char     | Eye                                                                                       | Left / Right / Left and right                                                                                                           |
| MHLATN                           | Num/cat  | Location laterality, N                                                                    | 1: Right / 2: Left / 4: Left and<br>right / 997: Not applicable                                                                         |

|             |         |                                           |                                                                                                                                                                                                                                                                                                                                                                                                                                                                                                                                                                                                                                                                                                                                                                                                                                                                                                                                                                                                                                           |
|-------------|---------|-------------------------------------------|-------------------------------------------------------------------------------------------------------------------------------------------------------------------------------------------------------------------------------------------------------------------------------------------------------------------------------------------------------------------------------------------------------------------------------------------------------------------------------------------------------------------------------------------------------------------------------------------------------------------------------------------------------------------------------------------------------------------------------------------------------------------------------------------------------------------------------------------------------------------------------------------------------------------------------------------------------------------------------------------------------------------------------------------|
| STUDYEYE    | Char    | Study eye                                 | Right / Left                                                                                                                                                                                                                                                                                                                                                                                                                                                                                                                                                                                                                                                                                                                                                                                                                                                                                                                                                                                                                              |
| prior       | Num/cat | Prior disease                             | .: Missing / 0: No / 1: Yes                                                                                                                                                                                                                                                                                                                                                                                                                                                                                                                                                                                                                                                                                                                                                                                                                                                                                                                                                                                                               |
| conc        | Num/cat | Concomitant disease                       | .: Missing / 0: No / 1: Yes                                                                                                                                                                                                                                                                                                                                                                                                                                                                                                                                                                                                                                                                                                                                                                                                                                                                                                                                                                                                               |
| ocular      | Num/cat | Ocular disease                            | .: Missing / 0: No / 1: Yes                                                                                                                                                                                                                                                                                                                                                                                                                                                                                                                                                                                                                                                                                                                                                                                                                                                                                                                                                                                                               |
| studyeeyeNY | Num/cat | Ocular disease related to the study eye   | .: Missing / 0: No / 1: Yes                                                                                                                                                                                                                                                                                                                                                                                                                                                                                                                                                                                                                                                                                                                                                                                                                                                                                                                                                                                                               |
| window      | Num/cat | Visit windowing                           | 0: baseline<br>0.1: First year<br>0.2: Second year<br>1: Window 1 (30 days)<br>2: Window 2 (60 days)<br>3: Window 3 (90 days)<br>4: Window 4 (120 days)<br>5: Window 5 (150 days)<br>6: Window 6 (180 days)<br>7: Window 7 (210 days)<br>8: Window 8 (240 days)<br>9: Window 9 (270 days)<br>10: Window 10 (300 days)<br>11: Window 11 (330 days)<br>12: Window 12 (360 days)<br>13: Window 13 (390 days)<br>14: Window 14 (420 days)<br>15: Window 15 (450 days)<br>16: Window 16 (480 days)<br>17: Window 17 (510 days)<br>18: Window 18 (540 days)<br>19: Window 19 (570 days)<br>20: Window 20 (600 days)<br>21: Window 21 (630 days)<br>22: Window 22 (660 days)<br>23: Window 23 (690 days)<br>24: Window 24 (720 days)<br>25: Window 25 (750 days)<br>26: Window 26 (780 days)<br>27: Window 27 (810 days)<br>28: Window 28 (840 days)<br>29: Window 29 (870 days)<br>30: Window 30 (900 days)<br>31: Window 31 (930 days)<br>32: Window 32 (960 days)<br>33: Window 33 (990 days)<br>34: Window 34 (1020 days)<br>999: last visit |
| QSLAT       | Char    | Location laterality                       |                                                                                                                                                                                                                                                                                                                                                                                                                                                                                                                                                                                                                                                                                                                                                                                                                                                                                                                                                                                                                                           |
| STUDYEYE    | Char    |                                           | Right / Left                                                                                                                                                                                                                                                                                                                                                                                                                                                                                                                                                                                                                                                                                                                                                                                                                                                                                                                                                                                                                              |
| Fraction    | Char    | Snellen acuity equivalent - smallest line |                                                                                                                                                                                                                                                                                                                                                                                                                                                                                                                                                                                                                                                                                                                                                                                                                                                                                                                                                                                                                                           |

|               |          |                                                     |                                                                                                                                                                                                                                                                                                                                         |
|---------------|----------|-----------------------------------------------------|-----------------------------------------------------------------------------------------------------------------------------------------------------------------------------------------------------------------------------------------------------------------------------------------------------------------------------------------|
| FractionCoded | Num/cat  | Snellen acuity equivalent - smallest line           | 1: 20 / 800<br>2: 20 / 640<br>3: 20 / 500<br>4: 20 / 400<br>5: 20 / 320<br>6: 20 / 250<br>7: 20 / 200<br>8: 20 / 160<br>9: 20 / 125<br>10: 20 / 100<br>11: 20 / 80<br>12: 20 / 63<br>13: 20 / 50<br>14: 20 / 40<br>15: 20 / 32<br>16: 20 / 25<br>17: 20 / 20<br>18: 20 / 16<br>19: 20 / 12.5<br>20: 20 / 10                             |
| FractionN     | Num/cont | Decimal fraction - smallest line                    |                                                                                                                                                                                                                                                                                                                                         |
| LogMAR        | Num/cont | LogMAR                                              |                                                                                                                                                                                                                                                                                                                                         |
| LogMARCat     | Num/cat  | LogMAR in categories                                | 1: <0<br>2: ≥0 to <0.1<br>3: ≥0.1 to <0.2<br>4: ≥0.2 to <0.3<br>5: ≥0.3 to <0.4<br>6: ≥0.4 to <0.5<br>7: ≥0.5 to <0.6<br>8: ≥0.6 to <0.7<br>9: ≥0.7 to <0.8<br>10: ≥0.8 to <0.9<br>11: ≥0.9 to <1.0<br>12: ≥1.0 to <1.1<br>13: ≥1.1 to <1.2<br>14: ≥1.2 to <1.3<br>15: ≥1.3 to <1.4<br>16: ≥1.4 to <1.5<br>17: ≥1.5 to <1.6<br>18: ≥1.6 |
| VAS           | Num/cont | Visual acuity final score                           |                                                                                                                                                                                                                                                                                                                                         |
| VAS_cat       | Num/cat  | Visual acuity score in categories                   | .: Missing / 1: <35 letters /2: ≥35 to <50 letters / 3: ≥50 letters                                                                                                                                                                                                                                                                     |
| BVA           | Num/cat  | Best visual acuity                                  | 1: Count fingers / 2: Hand motion / 3: Light perception / 4: No light perception                                                                                                                                                                                                                                                        |
| BVAE          | Num/cat  | Best visual acuity extended                         | 0: Valid ETDRS assessment / 1: Count fingers / 2: Hand motion / 3: Light perception / 4: No light perception                                                                                                                                                                                                                            |
| VAS_diff      | Num/cont | Difference to baseline of visual acuity final score |                                                                                                                                                                                                                                                                                                                                         |

|                      |          |                                                                   |                                                                                                                         |
|----------------------|----------|-------------------------------------------------------------------|-------------------------------------------------------------------------------------------------------------------------|
| VAS_diff_cat         | Num/cat  | Difference to baseline of visual acuity final score in categories | 1: ≤ -6 lines / 2: > -6 lines to ≤ -3 lines / 3: > -3 lines to < +3 lines / 4: ≥ +3 lines to < +6 lines / 5: ≥ +6 lines |
| responder            | Num/cat  | Responder Y/N                                                     | 0: Non-responder / 1: Responder                                                                                         |
| nr_visit             | Num/cont | Number of visits                                                  |                                                                                                                         |
| nr_visit_360         | Num/cont | Number of visits in the 1st year                                  |                                                                                                                         |
| nr_visit_2nd_yr      | Num/cont | Number of visits in the 2nd year                                  |                                                                                                                         |
| nr_visit_720         | Num/cont | Number of visits in full 2 years                                  |                                                                                                                         |
| nr_visit_cat         | Num/cat  | Number of visits                                                  | .: Missing / 0: No visits / 1: 1 visit / 2: 2 visits / 3: 3 visits / ...                                                |
| nr_visit_360_cat     | Num/cat  | Number of visits in the 1st year                                  | .: Missing / 0: No visits / 1: 1 visit / 2: 2 visits / 3: 3 visits / ...                                                |
| nr_visit_2nd_yr_cat  | Num/cat  | Number of visits in the 2nd year                                  | .: Missing / 0: No visits / 1: 1 visit / 2: 2 visits / 3: 3 visits / ...                                                |
| nr_visit_720_cat     | Num/cat  | Number of visits in full 2 years                                  | .: Missing / 0: No visits / 1: 1 visit / 2: 2 visits / 3: 3 visits / ...                                                |
| NR_MVISIT            | Num/cont | Number of monitoring visits                                       |                                                                                                                         |
| NR_MVISIT_360        | Num/cont | Number of monitoring visits in the 1st year                       |                                                                                                                         |
| NR_MVISIT_2ND_YR     | Num/cont | Number of monitoring visits in the 2nd year                       |                                                                                                                         |
| NR_MVISIT_720        | Num/cont | Number of monitoring visits in full 2 years                       |                                                                                                                         |
| NR_MVISIT_CAT        | Num/cat  | Number of monitoring visits                                       | .: Missing / 0: No visits / 1: 1 visit / 2: 2 visits / 3: 3 visits / ...                                                |
| NR_MVISIT_360_CAT    | Num/cat  | Number of monitoring visits in the 1st year                       | .: Missing / 0: No visits / 1: 1 visit / 2: 2 visits / 3: 3 visits / ...                                                |
| NR_MVISIT_2ND_YR_CAT | Num/cat  | Number of monitoring visits in the 2nd year                       | .: Missing / 0: No visits / 1: 1 visit / 2: 2 visits / 3: 3 visits / ...                                                |
| NR_MVISIT_720_CAT    | Num/cat  | Number of monitoring visits in full 2 years                       | .: Missing / 0: No visits / 1: 1 visit / 2: 2 visits / 3: 3 visits / ...                                                |
| NR_CVISIT            | Num/cont | Number of clinical visits                                         |                                                                                                                         |
| NR_CVISIT_360        | Num/cont | Number of clinical visits in the 1st year                         |                                                                                                                         |
| NR_CVISIT_2ND_YR     | Num/cont | Number of clinical visits in the 2nd year                         |                                                                                                                         |
| NR_CVISIT_720        | Num/cont | Number of clinical visits in full 2 years                         |                                                                                                                         |
| NR_CVISIT_CAT        | Num/cat  | Number of clinical visits                                         | .: Missing / 0: No visits / 1: 1 visit / 2: 2 visits / 3: 3 visits / ...                                                |
| NR_CVISIT_360_CAT    | Num/cat  | Number of clinical visits in the 1st year                         | .: Missing / 0: No visits / 1: 1 visit / 2: 2 visits / 3: 3 visits / ...                                                |
| NR_CVISIT_2ND_YR_CAT | Num/cat  | Number of clinical visits in the 2nd year                         | .: Missing / 0: No visits / 1: 1 visit / 2: 2 visits / 3: 3 visits / ...                                                |

|                         |          |                                                                                 |                                                                                                 |
|-------------------------|----------|---------------------------------------------------------------------------------|-------------------------------------------------------------------------------------------------|
| NR_CVISIT_720_CAT       | Num/cat  | Number of clinical visits in full 2 years                                       | .: Missing / 0: No visits / 1: 1 visit / 2: 2 visits / 3: 3 visits / ...                        |
| treatment_strat         | Num/cat  | Type of anti-VEGF treatment                                                     | 1: Ranibizumab / 2: Bevacizumab / 3: Pegaptanib / 4: Total                                      |
| nr_inject               | Num/cont | Number of injections                                                            |                                                                                                 |
| nr_inject_360           | Num/cont | Number of injections in the 1st year                                            |                                                                                                 |
| nr_inject_2nd_yr        | Num/cont | Number of injections in the 2nd year                                            |                                                                                                 |
| nr_inject_720           | Num/cont | Number of injections in full 2 years                                            |                                                                                                 |
| nr_inject_cat           | Num/cat  | Number of injections                                                            | .: Missing / 0: No injections / 1: 1 injection / 2: 2 injections / 3: 3 injections / ....       |
| nr_inject_360_cat       | Num/cat  | Number of injections in the 1st year                                            | .: Missing / 0: No injections / 1: 1 injection / 2: 2 injections / 3: 3 injections / ....       |
| nr_inject_2nd_yr_cat    | Num/cat  | Number of injections in the 2nd year                                            | .: Missing / 0: No injections / 1: 1 injection / 2: 2 injections / 3: 3 injections / ....       |
| nr_inject_720_cat       | Num/cat  | Number of injections in full 2 years                                            | .: Missing / 0: No injections / 1: 1 injection / 2: 2 injections / 3: 3 injections / ....       |
| tme_dia2inj             | Num/cont | Time from diagnosis to start of treatment                                       |                                                                                                 |
| tme_switch              | Num/cont | Time from start of treatment to first treatment switch                          |                                                                                                 |
| tme_blind               | Num/cont | Time from start of treatment to first occurrence of legal blindness             |                                                                                                 |
| tme_blind_no_imp        | Num/cont | Time from start of treatment to first legal blindness without later improvement |                                                                                                 |
| trt_dur                 | Num/cont | Treatment duration                                                              |                                                                                                 |
| tme_study               | Num/cont | Time in study                                                                   |                                                                                                 |
| CNV_cat_strat           | Num/cat  | Baseline lesion type                                                            | .: Missing / 1: No CNV / 2: Classic CNV / 3: Classic and occult / 4: Occult / 5: Disciform scar |
| CNVLOC                  | Num/cat  | FA - location of CNV                                                            | 1: Subfoveal / 2: Juxtafoveal / 3: Extrafoveal / 992: Unknown                                   |
| nr_trtchg_cat_strat     | Num/cat  | Patients that only took ranibizumab versus patients who changed                 | .: Missing / 0: Only ranibizumab / 1: Patients who switched                                     |
| retinal_break_cat_strat | Num/cat  | Baseline presence of retinal breaks                                             | .: Missing / 0: No / 1: Yes                                                                     |
| PED_strat               | Num/cat  | Baseline presence of PED                                                        | .: Missing / 0: No / 1: Yes                                                                     |
| nr_OPHT                 | Num/cont | Number of ophthalmoscopies                                                      |                                                                                                 |

|                    |          |                                            |                                                                                                                   |
|--------------------|----------|--------------------------------------------|-------------------------------------------------------------------------------------------------------------------|
| nr_OPHT_360        | Num/cont | Number of ophthalmoscopies in the 1st year |                                                                                                                   |
| nr_OPHT_2nd_yr     | Num/cont | Number of ophthalmoscopies in the 2nd year |                                                                                                                   |
| nr_OPHT_720        | Num/cont | Number of ophthalmoscopies in full 2 years |                                                                                                                   |
| nr_OPHT_cat        | Num/cat  | Number of ophthalmoscopies                 | .: Missing / 0: No ophthalmoscopies / 1: 1 ophthalmoscopy / 2: 2 ophthalmoscopies / 3: 3 ophthalmoscopies /....   |
| nr_OPHT_360_cat    | Num/cat  | Number of ophthalmoscopies in the 1st year | .: Missing / 0: No ophthalmoscopies / 1: 1 ophthalmoscopy / 2: 2 ophthalmoscopies / 3: 3 ophthalmoscopies /....   |
| nr_OPHT_2nd_yr_cat | Num/cat  | Number of ophthalmoscopies in the 2nd year | .: Missing / 0: No ophthalmoscopies / 1: 1 ophthalmoscopy / 2: 2 ophthalmoscopies / 3: 3 ophthalmoscopies<br>.... |
| nr_OPHT_720_cat    | Num/cat  | Number of ophthalmoscopies in full 2 years | .: Missing / 0: No ophthalmoscopies / 1: 1 ophthalmoscopy / 2: 2 ophthalmoscopies / 3: 3 ophthalmoscopies /....   |
| nr_OCT             | Num/cont | Number of OCTs                             |                                                                                                                   |
| nr_OCT_360         | Num/cont | Number of OCTs in the 1st year             |                                                                                                                   |
| nr_OCT_2nd_yr      | Num/cont | Number of OCTs in the 2nd year             |                                                                                                                   |
| nr_OCT_720         | Num/cont | Number of OCTs in full 2 years             |                                                                                                                   |
| nr_OCT_cat         | Num/cat  | Number of OCTs                             | .: Missing / 0: No OCTs / 1: 1 OCT / 2: 2 OCTs / 3: 3 OCTs /....                                                  |
| nr_OCT_360_cat     | Num/cat  | Number of OCTs in the 1st year             | .: Missing / 0: No OCTs / 1: 1 OCT / 2: 2 OCTs / 3: 3 OCTs /....                                                  |
| nr_OCT_2nd_yr_cat  | Num/cat  | Number of OCTs in the 2nd year             | .: Missing / 0: No OCTs / 1: 1 OCT / 2: 2 OCTs / 3: 3 OCTs /....                                                  |
| nr_OCT_720_cat     | Num/cat  | Number of OCTs in full 2 years             | .: Missing / 0: No OCTs / 1: 1 OCT / 2: 2 OCTs / 3: 3 OCTs /....                                                  |
| nr_FA              | Num/cont | Number of FAs                              |                                                                                                                   |
| nr_FA_360          | Num/cont | Number of FAs in the 1st year              |                                                                                                                   |
| nr_FA_2nd_yr       | Num/cont | Number of FAs in the 2nd year              |                                                                                                                   |
| nr_FA_720          | Num/cont | Number of FAs in full 2 years              |                                                                                                                   |
| nr_FA_cat          | Num/cat  | Number of FAs                              | .: Missing / 0: No FA / 1: 1 FA / 2: 2 FAs / 3: 3 FAs /....                                                       |



|                   |          |                                |                                                                 |
|-------------------|----------|--------------------------------|-----------------------------------------------------------------|
| nr_FA_360_cat     | Num/cat  | Number of FAs in the 1st year  | .: Missing / 0: No FA / 1: 1 FA / 2: 2 FAs / 3: 3 FAs /....     |
| nr_FA_2nd_yr_cat  | Num/cat  | Number of FAs in the 2nd year  | .: Missing / 0: No FA / 1: 1 FA / 2: 2 FAs / 3: 3 FAs /....     |
| nr_FA_720_cat     | Num/cat  | Number of FAs in full 2 years  | .: Missing / 0: No FA / 1: 1 FA / 2: 2 FAs / 3: 3 FAs /....     |
| nr_ICG            | Num/cont | Number of ICGs                 |                                                                 |
| nr_ICG_360        | Num/cont | Number of ICGs in the 1st year |                                                                 |
| nr_ICG_2nd_yr     | Num/cont | Number of ICGs in the 2nd year |                                                                 |
| nr_ICG_720        | Num/cont | Number of ICGs in full 2 years |                                                                 |
| nr_ICG_cat        | Num/cat  | Number of ICGs                 | .: Missing / 0: No ICG / 1: 1 ICG / 2: 2 ICG / 3: 3 ICG<br>.... |
| nr_ICG_360_cat    | Num/cat  | Number of ICGs in the 1st year | .: Missing / 0: No ICG / 1: 1 ICG / 2: 2 ICG / 3: 3 ICG<br>.... |
| nr_ICG_2nd_yr_cat | Num/cat  | Number of ICGs in the 2nd year | .: Missing / 0: No ICG / 1: 1 ICG / 2: 2 ICG / 3: 3 ICG /....   |
| nr_ICG_720_cat    | Num/cat  | Number of ICGs in full 2 years | .: Missing / 0: No ICG / 1: 1 ICG / 2: 2 ICG / 3: 3 ICG /....   |

Cat, categorical; char, character; CNV, choroidal neovascularization; cont, continuous; ETDRS, Early Treatment Diabetic Retinopathy Study; FA, fluorescein angiography; IGA, indocyanine green angiography; logMar, logarithm of the minimum angle of resolution; NUM, number; OCT, optical coherence tomography; PED, pigment epithelium detachment; VEGF, vascular endothelial growth factor.
